# Supplementary material for: The Prevalence and Serological Association of Hepatitis D Virus Genotypes in Taiwan
Source: MDPI journal article supplement (doi:10.3390/pathogens10101227), 2021-09-23
Supplement: s1 [file s1]

## Supplementary

**Table S1. Primer and conditions for nested PCR carried out in this study for amplicon region of L-HDAg of HDV**

**Genome.**

| HDV Genome<br>Target Region | Primer<br>Name | Primer Sequence (5'-3') | PCR Conditions |                        |                    |                      | Reference |
|-----------------------------|----------------|-------------------------|----------------|------------------------|--------------------|----------------------|-----------|
|                             |                |                         | Pre-heat       | Cycles                 | Final<br>Extension | Product<br>size (bp) |           |
| L-HDAg (888-1122)           | HDV04-F        | GGATGCCCAGGTCGGACCG     | 94°C/5<br>min  | 94°C/30                | 72°C/7<br>min      | 323                  | 9         |
|                             | HDV05-R        | AAGAAGAGRAGCCGGCCCGY    |                | sec.                   |                    |                      |           |
|                             |                |                         |                |                        |                    |                      |           |
|                             | HDV06-F        | ATGCCATGCCGACCCGAAGA    |                | 72°C/45                |                    | 234                  |           |
|                             | HDV07-R        | GGGGAGCGCCCGGDGGCGG     |                | sec.<br>(35<br>cycles) |                    |                      |           |

HDV: Hepatitis delta virus; PCR: polymerase chain reaction; bp: base pair; L-HDAg: large hepatitis delta antigen

**Table S2. Distribution of HDV genotypes in HBD-HDV superinfection patients.**

| <b>No.</b> | <b>Patient ID</b> | <b>Age</b> | <b>Gender</b> | <b>HDV Load(copies/ml)<sup>1</sup></b> | <b>HDV Genotype</b> |
|------------|-------------------|------------|---------------|----------------------------------------|---------------------|
| 1          | GP-1a             | 68         | Male          | 6.0                                    | 2                   |
| 2          | GP-2a             | 39         | Male          | 5.9                                    | 1                   |
| 3          | GP-4a             | 62         | Male          | 4.6                                    | 2                   |
| 4          | GP-5a             | 56         | Male          | 3.9                                    | 1                   |
| 5          | GP-6a             | 61         | Male          | 3.5                                    | 4                   |
| 6          | GP-7a             | 64         | Male          | 3.1                                    | 2                   |
| 7          | GP-8a             | 58         | Male          | 2.9                                    | 4                   |
| 8          | GP-9a             | 45         | Female        | 2.8                                    | 4                   |
| 9          | GP-10a            | 28         | Male          | 2.7                                    | 2                   |
| 10         | GP-11a            | 67         | Male          | 2.5                                    | 2                   |
| 11         | GP-12a            | 61         | Female        | 2.3                                    | 1                   |
| 12         | GP-14a            | 39         | Male          | 1.3                                    | 4                   |
| 13         | GP-15a            | 60         | Male          | 1.2                                    | 4                   |
| 14         | GP-16a            | 45         | Female        | 2.8                                    | 2                   |
| 15         | GP-17a            | 61         | Male          | 1.1                                    | 4                   |
| 16         | GP-18a            | 53         | Male          | 1.0                                    | 4                   |
| 17         | GP-19a            | 50         | Male          | 0.8                                    | 4                   |
| 18         | GP-20a            | 64         | Female        | 0.8                                    | 4                   |
| 19         | GP-21a            | 41         | Male          | 0.8                                    | 4                   |
| 20         | GP-22a            | 31         | Female        | 0.7                                    | 4                   |
| 21         | GP-23a            | 58         | Male          | 0.6                                    | 1                   |
| 22         | GP-24a            | 43         | Male          | 0.6                                    | 4                   |
| 23         | GP-25a            | 47         | Male          | 0.6                                    | 4                   |
| 24         | GP-26a            | 64         | Female        | 0.6                                    | 4                   |

GP: general population patient 1a etc.; HDV: hepatitis delta virus, viral load in log<sub>10</sub> copies/ml

Supplementary Figures:

Figure S1.

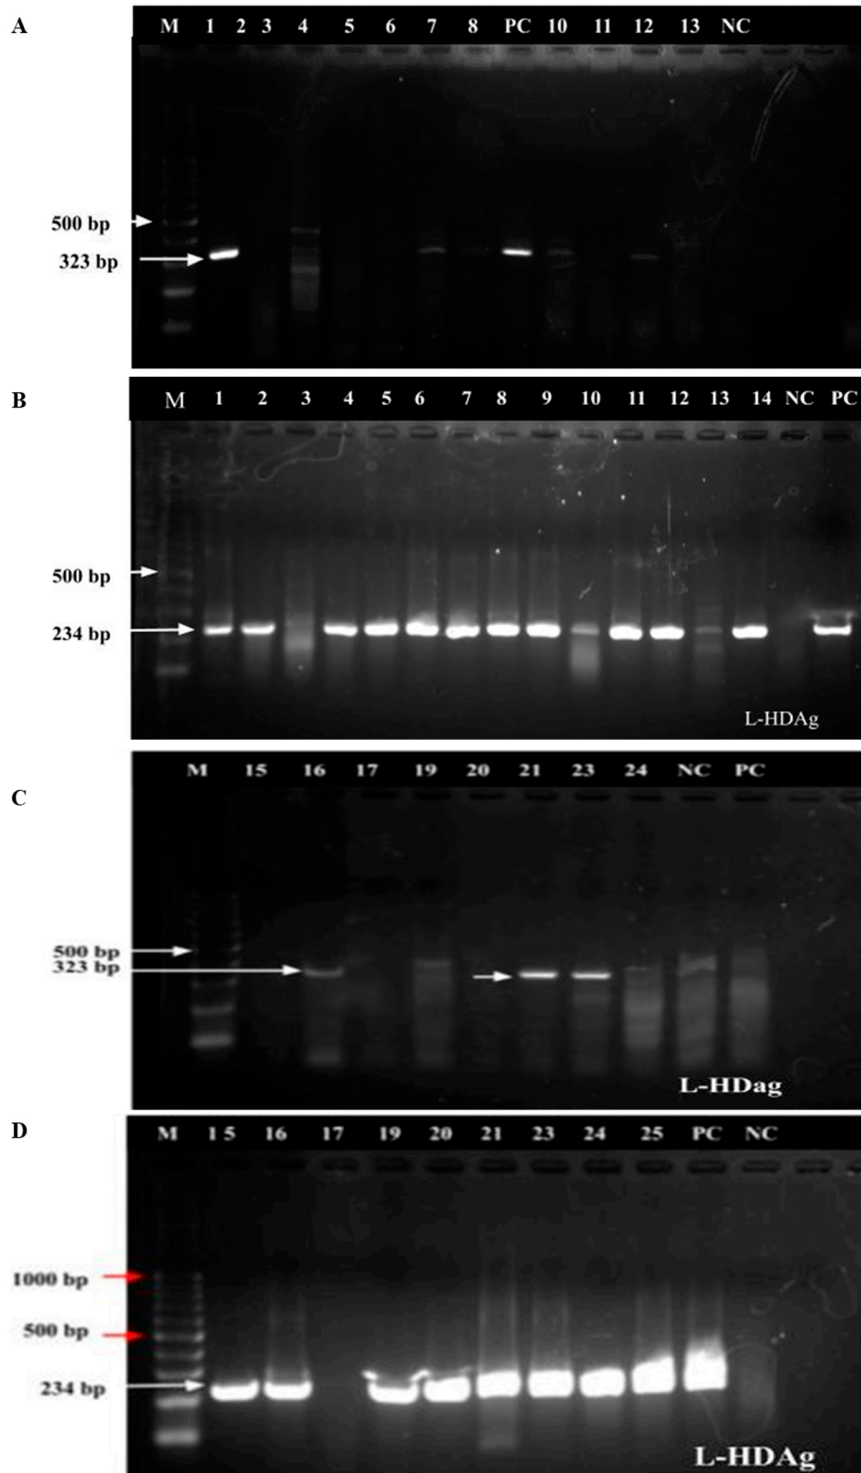

**Figure S1. Agarose Gel Electrophoresis of HDV amplicons from nested PCR using primer-specific targeting for L-HDAg.** 1st round PCR product is 323 bp (**A, C**), 2nd round PCR product is 234 bp (**B, D**) M: Marker; NC: negative control; PC: positive control; Samples were loaded at 6  $\mu$ L (**A, B, C**); Samples were loaded at 10  $\mu$ L (**D**) in 3% gel. Sample number list as below: 1: GP-1a; 2: GP-2a; 3: GP-3a; 4: GP-4a; 5: GP-5a; 6: GP-6a; 7: GP-7a; 8: GP-8a; 9: GP-9a; 10: GP-10a; 11: GP-11a; 12: GP-12a; 13: GP-13a; 14: GP-14a; 15: GP-15a; 16: GP-16a; 17: GP-17a; 19: GP-19a; 20: GP-20a; 21: GP-21a; 23: GP-23a; 24: GP-24a; 25: GP-25a.

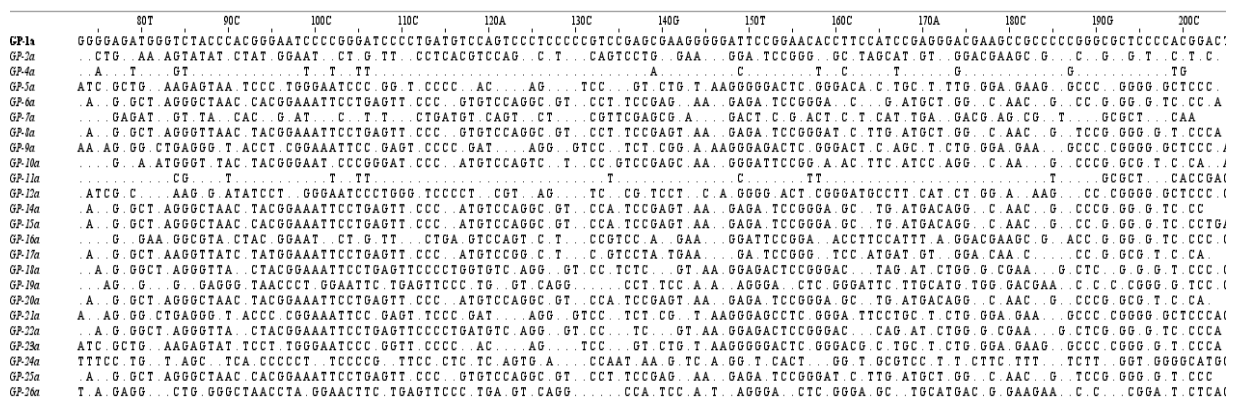

**Figure S2. Representative HDV sequences of Taiwan HBV/HDV superinfection patients showing patient-specific HDV isolates alignment.** Sequence table showing conserve and non-conserved regions of HDV partial genome (L-HDAg). GP-9a is used as the reference sequence for alignment. Dots depicts conservative nucleotides. Consensus graph shows the distribution pattern and color of the nucleotide in alignment. Sequence alignment was done in Jalview software v. 2.11.1.0.
